# Supplementary material for: The ubiquitin E3 ligase BFAR promotes degradation of PNPLA3
Source: PubMed Central journal article supplement — Proc Natl Acad Sci U S A. 2024 Jan 31;121(6):e2312291121. doi: 10.1073/pnas.2312291121 (PMC10861911; doi:10.1073/pnas.2312291121), 2024-01-31
Supplement: pnas.2312291121.sapp.pdf [file pnas.2312291121.sapp.pdf]

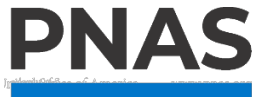

## Supporting Information for

# The Ubiquitin E3 Ligase BFAR Promotes Degradation of PNPLA3

Avash Das<sup>a,1</sup>, Haili Cheng<sup>a,1</sup>, Yang Wang<sup>a</sup>, Lisa Kinch<sup>b</sup>, Guosheng Liang<sup>a</sup>, Sen Hong<sup>a</sup>,  
Helen H. Hobbs<sup>a,b\*</sup>, Jonathan C. Cohen<sup>a,c\*</sup>

Jonathan C Cohen and Helen H. Hobbs

Email: [jonathan.cohen@utsouthwestern.edu](mailto:jonathan.cohen@utsouthwestern.edu) or [helen.hobbs@utsouthwestern.edu](mailto:helen.hobbs@utsouthwestern.edu).

### **This PDF file includes:**

Supporting text  
Figures S1 to S6  
Tables S1 to S3  
SI References

## Supporting Information Text

### Abbreviations:

BCA, Bicinchoninic acid; DMEM, Dulbecco's Modified Eagle Medium; DMSO, Dimethyl Sulfoxide; FBS, Fetal Bovine Serum; FT, flow through; HEK293T, human embryonal kidney 293T; mAb, monoclonal antibody; pAb, polyclonal antibody; PBS, Phosphate Buffered Saline; PVDF, polyvinylidene difluoride; SDS, Sodium dodecyl-sulfate; SDS-PAGE, Sodium dodecyl-sulfate polyacrylamide gel electrophoresis; TECP, Tris(2-carboxyethyl)phosphine hydrochloride

## Materials

| REAGENT                                         | SOURCE                    | IDENTIFIER    |
|-------------------------------------------------|---------------------------|---------------|
| <b>Antibodies (Ab)</b>                          |                           |               |
| Goat anti-rabbit IgG 2° Ab, Alexa Fluor™ 488    | Invitrogen                | A-11034       |
| Goat anti-mouse (m) IgG 2° Ab, Alexa Fluor™ 555 | Invitrogen                | A-21422       |
| Mouse anti-mABHD5 monoclonal Ab (mAb)           | Abnova                    | H00051099-M01 |
| Mouse anti-human (h)PNPLA3 mAb (11C5)           | (1)                       |               |
| Mouse anti-ubiquitin mAb                        | Santa Cruz                | P4D1          |
| Mouse anti-hBFAR mAb (10E10)                    | This study- see Methods   |               |
| Mouse anti-mBFAR mAb (40H7)                     | This study-see Methods    |               |
| Rabbit anti-h/mATGL polyclonal Ab (pAb)         | Cell Signaling Technology | 2138S         |
| Rabbit anti-h/mBI-1 pAb                         | Thermo Fisher Scientific  | 26782-1-AP    |
| Rabbit anti-calnexin pAb                        | Abcam                     | ab10286       |
| Rabbit anti-mPNPLA3 mAb (19A6)                  | (1)                       |               |
| Rabbit anti-h p21 mAb                           | Cell Signaling Technology | 2947S         |
| Rabbit anti-h/m perilipin 2 pAb                 | Abcam                     | Ab108323      |
| Rabbit anti-mSREBP-1 mAb (20B12)                | (2)                       |               |
| <b>Bacterial and Virus Strains</b>              |                           |               |
| <i>E. coli</i> BL21 Star™ (DE3) pLysS           | Thermo Fisher Scientific  | C602003       |
| <i>E. coli</i> DH5a                             | GoldBio                   | CC-101-TR     |
| <i>E. coli</i> DH10Bac                          | Thermo Fisher Scientific  | 10361012      |
| MAX Efficiency™ DH5a                            | Thermo Fisher Scientific  | 18258012      |
| One Shot™ Stbl3™ <i>E. coli</i>                 | Thermo Fisher Scientific  | C737303       |

## Buffers

|                                            |                          |           |
|--------------------------------------------|--------------------------|-----------|
| 4X Laemmli Sample Buffer                   | Bio Rad                  | 1610747   |
| 6X Laemmli Sample Buffer                   | Thermo Fisher Scientific | J61337.AC |
| Dulbecco's Phosphate Buffered Saline (PBS) | Sigma-Aldrich            | D8537     |
| E3 Ligase Reaction Buffer                  | R&D Systems              | B-71      |
| TRIS Buffered Saline (TBS)                 | Sigma-Aldrich            | T6664     |

### Cell Lines

|                           |      |          |
|---------------------------|------|----------|
| HEK293T                   | ATCC | CRL-1573 |
| HEK293S GnTI <sup>-</sup> | ATCC | CRL-3022 |
| HepG2                     | ATCC | HB-8065  |
| HuH7                      | ATCC | PTA-4583 |
| <i>Sf9</i>                | ATCC | CRL-1711 |

### Chemicals

|                                                     |                          |             |
|-----------------------------------------------------|--------------------------|-------------|
| 3xFLAG peptide                                      | ApexBio                  | A6001       |
| cOmplete Mini EDTA-free Protease Inhibitor Cocktail | Sigma-Aldrich            | 11836170001 |
| Dimethyl Sulfoxide (DMSO)                           | Sigma-Aldrich            | D2650       |
| Fetal Bovine Serum (FBS)                            | Cytiva                   | SH30396.03  |
| Geneticin™ (G418 sulfate)                           | Thermo Fisher Scientific | 10131035    |
| Glycerol                                            | Sigma-Aldrich            | G9012       |
| Isopropyl β-d-1-thiogalactopyranoside (IPTG)        | Sigma-Aldrich            | I6758       |
| Kanamycin sulfate                                   | Sigma-Aldrich            | K1377       |
| Leupeptin                                           | vivitide                 | ILP-4041    |
| MLN4924                                             | Sigma-Aldrich            | 5.05477     |
| MG132                                               | Peptide Institute, INC   | 3178-v      |
| Mg-ATP (100 mM)                                     | R&D Systems              | B-20        |
| n-Dodecyl-β-D-Maltopyranoside (DDM)                 | Anatrace                 | D310        |
| Penicillin and streptomycin                         | Corning                  | 30-002-C1   |
| Phenylmethylsulfonyl fluoride (PMSF)                | Sigma-Aldrich            | 93482       |
| PR-619                                              | Sigma-Aldrich            | SML0430     |
| Puromycin dihydrochloride                           | Sigma-Aldrich            | P8833       |
| Sodium butyrate                                     | Sigma-Aldrich            | 303410      |
| Tris(2-carboxyethyl)phosphine hydrochloride (TCEP)  | Sigma-Aldrich            | 75259       |
| Tris hydrochloride                                  | Sigma-Aldrich            | 10812846001 |

### Enzymes

|                    |                     |            |
|--------------------|---------------------|------------|
| Benzonase nuclease | Sigma-Aldrich       | E1014-25KU |
| T4 DNA Ligase      | New England Biolabs | M0202S     |

## Kits

|                                           |                          |           |
|-------------------------------------------|--------------------------|-----------|
| Anti-FLAG® M2 Affinity Gel                | Sigma-Aldrich            | A2220     |
| Anti-FLAG® M2 Magnetic Beads              | Sigma-Aldrich            | M8823     |
| DNeasy Blood & Tissue Kits                | Qiagen                   | 69504     |
| HiBiT Pull-down Kit                       | Promega                  | CS1967B02 |
| Nano-Glo HiBiT Blotting System            | Promega                  | N2410     |
| Nano-Glo HiBiT Lytic Detection System     | Promega                  | N3030     |
| Nano-Glo Live Cell Assay System           | Promega                  | N2011     |
| Ni-NTA Agarose                            | Qiagen                   | 30210     |
| NucleoBond Xtra Maxi                      | Takara                   | 740414.1  |
| Pierce BCA Protein Assay Kit              | Thermo Fisher Scientific | 23224     |
| Pierce c-Myc-Tag Magnetic IP/Co-IP Kit    | Thermo Fisher Scientific | 88844X    |
| Tandem Ubiquitin Binding Entities (TUBEs) | LifeSensors              | UM402     |

## Medium

|                                                                          |                          |            |
|--------------------------------------------------------------------------|--------------------------|------------|
| Dulbecco's Modified Eagle Medium (DMEM) with L-Glutamine, 4.5g/L Glucose | Thermo Fisher Scientific | MT10013CV  |
| Freestyle 293 Expression Medium                                          | Gibco                    | 12338018   |
| Luria Broth (LB)                                                         | Fisher Scientific        | BP1426-500 |
| Opti-MEM™ I Reduced Serum Medium                                         | Thermo Fisher Scientific | 31985070   |
| Sf-900 III Serum Free Medium (SFM)                                       | Gibco                    | 12658027   |

## Oligonucleotides

See Table S1

## Recombinant DNA

|                                  |                          |            |
|----------------------------------|--------------------------|------------|
| pSpCas9(BB)-2A-Puro (PX459) V2.0 | Addgene                  | 62988      |
| BFAR-Myc-DDK in pLenti-C-Myc-DDK | Origene                  | RC200078L1 |
| pBiT3.1-C [CMV/HiBiT/Blast]      | Promega                  | N2361      |
| pcDNA3.1-PNPLA3-3XFLAG           | This study (see Methods) |            |
| pCMV3-Myc-BFAR (1-450)           | This study (see Methods) |            |
| pCMV3-Myc-BFAR (1-140)           | This study (see Methods) |            |
| pCMV3-Myc-BFAR (140-450)         | This study (see Methods) |            |
| pEG BacMam                       | Addgene                  | 160451     |
| pEG BacMam-FLAG-PNPLA3           | This paper               |            |
| pET28a                           | Novagen                  | 69864      |
| pET28a-BFAR-His <sub>6</sub>     | This paper               |            |
| pLVX-Ef1a-IRES-Puro              | Clontech                 | 631988     |

## Recombinant Proteins

|                                                      |             |            |
|------------------------------------------------------|-------------|------------|
| His <sub>6</sub> -Ubiquitin-Activating Enzyme (UBE1) | R&D Systems | E-304      |
| Human His <sub>6</sub> -BFAR (1-331aa)               | Proteintech | ag7755     |
| Human UbcH5b/UBE2D2                                  | R&D Systems | E2-622-100 |

## Software and Algorithms

|                        |                       |
|------------------------|-----------------------|
| FlowJo v10             | BD Biosciences        |
| Image Studio Lite v5.2 | LI-COR Odyssey system |
| Prism 8                | GraphPad              |

## Other

|                                                                         |                          |           |
|-------------------------------------------------------------------------|--------------------------|-----------|
| AKTA Pure Chromatography System                                         | Cytiva                   | 29018224  |
| BD FACSCalibur                                                          | BD Biosciences           | HLA-B27   |
| C57Bl/6J mice                                                           | The Jackson Laboratory   |           |
| Chow diet (rodent) 16% protein                                          | Teklad Global            |           |
| Corning Costar TC-Treated 6-Well Plates                                 | Sigma-Aldrich            | CLS3516   |
| Criterion™ TGX™ Precast Midi Protein Gel                                | Bio-Rad                  | 5671085   |
| FuGENE® HD Transfection Reagent                                         | Promega                  | E2311     |
| High Sucrose Diet: 74% kCal from sucrose                                | MP Biomedicals           | 901683    |
| HCS LipidTOX™ Deep Red Neutral Lipid Stain                              | Invitrogen               | H34477    |
| HisTrap HP, 5ml                                                         | Cytiva                   | 17524802  |
| Instant nonfat dry milk                                                 | Nestle                   |           |
| Lenti-X™ Concentrator                                                   | Clontech                 | 631232    |
| Lipofectamine™ 3000 Transfection Reagent                                | Thermo Fisher Scientific | L3000008  |
| Lipofectamine™ RNAiMAX Transfection Reagent                             | Thermo Fisher Scientific | 13778075  |
| Nalgene Cryogenic vials                                                 | Thermo Fisher Scientific | 5000-0012 |
| Millex-HV Syringe Filter Unit (4mm, 0.45 µm pore)                       | Sigma-Aldrich            | SLHV033RS |
| Nonfat dry milk (powder)                                                | Nestle                   |           |
| Polybrene Infection/Transfection Reagent                                | Sigma-Aldrich            | TR-1003-G |
| Precast Protein Gels 10% Mini-PROTEAN® TGX™                             | Bio-Rad                  | 4561036S  |
| Sonic Dismembrator                                                      | Thermo Fisher Scientific | Model 100 |
| Superdex 200 Increase 10/300 GL column                                  | Cytiva                   | 28990944  |
| Superose 6 Increase 10/300 GL column                                    | Cytiva                   | 29091596  |
| SuperSignal™ West Pico PLUS Chemiluminescent Substrate                  | Thermo Fisher Scientific | 34577     |
| Trans-Blot Turbo RTA Midi 0.2 µm Nitrocellulose Membrane & Transfer Kit | Bio-Rad                  | 1704271   |

---

## METHODS

**Generation of Lentiviruses.** Human PNPLA3 was cloned into pBiT3.1-C [CMV/HiBiT/Blast] using restriction ligation (*EcoRI* and *SacI*). A 12 bp polylinker was included between the coding regions of PNPLA3 and HiBiT. PNPLA3-HiBiT was then subcloned into the *EcoRI* and *XbaI* restriction sites in pLVX-Ef1a-IRES-Puro and pLVX-Ef1a-IRES-ZsGreen. Plasmids were propagated in *E. coli* and sequence integrity was confirmed by Sanger sequencing. Plasmids were then packaged into lentiviruses in human embryonal kidney (HEK) 293T cells, cultured in DMEM-high glucose containing 5% FBS and 2% Penicillin-Streptomycin (10,000 U/mL). Cells were plated in 6-well plates at  $5 \times 10^5$  cells per well and grown until 70% confluent. The lentiviral plasmids and two envelope plasmids, psPAX2 and PMD2.G, were resuspended in OptiMEM (110  $\mu$ L/well) at a ratio of 1:0.9:0.1 in the presence of FuGENE® HD Transfection Reagent (2  $\mu$ g/well). Solutions were incubated for 15 min at room temperature and used to transfect 293T cells. The medium was replenished with FBS (700  $\mu$ L) for 24 h after transfection and collected for virus propagation 48 h and 72 h later. The medium was filtered through a polyvinylidene difluoride (PVDF) filter (0.45  $\mu$ m) using a Millex-HV Syringe Filter Unit and then stored at 4°C. The media was recovered at 48 h and 72 h, pooled and concentrated 3:1 (Lenti-X™ Concentrator). Viral particles were pelleted by centrifugation at 1500g for 45 min, resuspended in 400  $\mu$ L of DMEM, and stored at -80°C.

**Human Liver-derived HuH7 Cells Stably Expressing PNPLA3.** Clonal HuH7 cells stably expressing PNPLA3-HiBiT were generated as follows: on day 0, HuH7 cells were plated at a density of  $2 \times 10^5$  cells/well in 6-well plates and incubated for 24 h with concentrated lentivirus encoding PNPLA3-HiBiT. Cells were switched to virus-free medium for 24 h then incubated for 10 d in medium containing FBS (5%) and puromycin dihydrochloride (2.5  $\mu$ g/ml). Single colonies were harvested using cloning cylinders. Expression of PNPLA3-HiBiT was verified using the NanoBiT® blotting system and immunoblotting with anti-hPNPLA3 mAb (11C5).

**NanoBiT® Blotting and Immunoblotting.** Cells were lysed using Lysis Buffer (10 mM Tris-Cl, pH 7.4, 100 mM NaCl, 1% SDS, 20% glycerol plus protease inhibitors and benzonase nuclease). Lysates were homogenized with an ultrasonic homogenizer, suspended in 4X Laemmli Sample Buffer and boiled at 95°C for 5 min. Samples were size-fractionated on SDS-PAGE (4-15%) followed by transfer to a nitrocellulose membrane. Membranes were blocked by incubating in TBST [20 mM TrisCl, pH 7.5, 150 mM NaCl, 0.1% Tween 20 plus nonfat dry milk (5%)] for 1 h and then incubated for 30 min with LgBiT and furimazine substrate according to the instructions of the manufacturer. The signal was quantified using the LI-COR Odyssey System.

For immunoblotting, cells were lysed in Lysis Buffer, homogenized with an ultrasonic homogenizer, mixed with 4X Laemmli Sample Buffer and boiled. Proteins were size-fractionated on polyacrylamide gels and transferred to nitrocellulose filters. Alternatively, cells were grown in 6-well plates and then washed once with PBS. Cells were then lysed by adding 120  $\mu$ L of RIPA buffer (25 mM Tris-Cl, pH 7.6, 150 mM NaCl, 1% NP-40, 1% sodium deoxycholate, 0.1% SDS plus protease inhibitors and

benzonase nuclease). After shaking for 30 min at room temperature, cell lysates were mixed with 6X Laemmli Sample Buffer (30  $\mu$ l) and boiled at 95°C for 5 min. A total of 15  $\mu$ l of sample was size-fractionated by SDS-PAGE and subjected to immunoblotting. The membrane was incubated overnight with the primary antibody, washed with TBST (3x10 min), and then incubated for 1 h with the secondary antibody. Blots were washed with TBST (3x10 min) before signals were revealed using SuperSignal West Pico PLUS Chemiluminescent Substrate and quantified using the LI-COR Odyssey System.

**Treatment of Cultured Hepatocytes with MG-132 and MLN4924.** A 10 mM stock solution of MG132 was prepared in DMSO. Cells were plated as described above and treated with MG-132 or DMSO in culture medium at a final concentration of 10  $\mu$ M. After 8 h, cells were harvested and immunoblotting was performed on cell lysates using antibodies, as listed above.

A stock solution of the NAE inhibitor, MLN4924 (10 mM), was prepared in DMSO. Cells were plated and grown as described above and then treated with MLN4924 (10  $\mu$ M) or an equivalent amount of DMSO in culture medium. Cells were harvested after 8 h and cell lysates were subjected to immunoblotting.

**Ubiquitin E3 Ligase siRNA Library Screening.** To identify ubiquitin E3 ligases that target PNPLA3 for degradation, we screened a commercially available, arrayed library of siRNAs targeting ubiquitination-related proteins, including 643 ubiquitin E3 ligases. The library was arrayed in 384-well plates with each well containing a pool of four siRNAs targeting each gene. The siRNAs were resuspended in Nuclease-Free Water to a concentration of 10  $\mu$ M. The library was screened in HuH7 cells stably expressing PNPLA3-HiBiT. Cells from the same passage were expanded and cryo-frozen in Cryogenic Vials. Cells from each vial were thawed and plated in 24-well plates at a density of  $5 \times 10^4$  cells/well. Each well was transfected with a pool of siRNA (15 pmol/well) using Lipofectamine™ RNAiMAX Transfection Reagent in Opti-MEM™ I Reduced Serum Medium to a volume of 110  $\mu$ L/well. Each siRNA pool was assayed in quadruplicate wells. Assays included cells treated with MG-132 (10  $\mu$ M/ml) or DMSO as positive and negative controls, respectively, and cells treated with ON-TARGETplus Human PNPLA3 siRNA and ON-TARGETplus Non-targeting Control siRNA (15 pM/well) as calibrators. After 48 h incubation at 37°C, PNPLA3 levels were analyzed in HuH7 cell lysates using the NanoBiT® Blotting assay.

**Inactivation of BFAR in Cultured Cells.** Cloned HuH7 cells lacking BFAR were generated as follows: LentiCRISPRv2 encoding two sgRNAs targeting BFAR were generated (Genbank Reference Sequence: NM\_016561.3). Targeting exon 6 of BFAR (amino acids Q69 to Q404) by sgRNA1 (Table S2) introduced a frameshift mutation followed by a premature stop codon at residue 361, while use of sgRNA2 (Table S2) introduced a premature termination codon in exon 4 at residue 209. On day 0, HuH7 cells were plated ( $2 \times 10^5$  cells per well) in 6-well plates. Separate dishes of cells were then infected with an sgRNA1- or sgRNA2-containing lentivirus. After 24 h, cells were switched to virus-free medium. After 24 h, the medium was changed to Selection Medium (DMEM medium plus 5% FBS and 2.5  $\mu$ g/ml of puromycin) and grown for 10 days. Single colonies were harvested using cloning cylinders. Genomic DNA was

extracted using DNeasy Blood & Tissue Kits according to the manufacturer's instructions. Colonies lacking BFAR expression were verified by DNA sequencing of genomic DNA. Single cell colonies selected from HuH7 cells infected with CRISPR-Lenti Non-Targeting Control Plasmid were used as a negative control. A similar strategy was used to create a genetically engineered HepG2 cell line lacking endogenous BFAR.

**Real Time PCR to Quantify Messenger RNA Levels.** Total RNA was prepared from cells and mouse tissues and levels of selected transcripts were measured using real-time PCR as described (2). The relative amount of messenger RNAs (mRNAs) was calculated using the comparative threshold cycle method using mouse 36B4 as an internal control (3). All reactions were performed in triplicate.

**Expression BFAR in HuH7 Cells.** A fragment encoding full length human BFAR (1-450), N-terminal BFAR (1-140), or C-terminal BFAR (140-450) was placed in the *KpnI/NotI* cloning sites downstream of a myc tag. The plasmids were expressed in HuH7 cells in 6-well plates using Lipofectamine 3000 according to the instructions of the manufacturer. After incubation for 48 h at 37°C in CO<sub>2</sub> (8.8%), cells were washed once with PBS and then lysed by adding 120 µl of RIPA buffer. After shaking 30 min at room temperature, cell lysates were mixed with 6X Laemmli Sample Buffer (30 µl) and boiled at 95°C for 5 min. For BFAR blotting, equal amount of 2x high reducing buffer (62.5 mM Tris-Cl, pH 6.8, 15% SDS, 8 M urea, 10% glycerol, 100 mM dithiothreitol) was added to cell lysates prior to addition of Laemmli Sample buffer. A total of 15 µl of sample was size-fractionated by SDS-PAGE and subjected to immunoblotting. The membrane was incubated overnight with the primary antibody, washed (3x10 min) with TBST, and then incubated for 1 h with secondary antibody. Blots were washed with TBST (3x10 min) before the signal was revealed using SuperSignal West Pico PLUS Chemiluminescent Substrate and quantified using the LI-COR Odyssey System.

**Purification of Human PNPLA3.** Human PNPLA3 was purified as described previously (4) with the following modifications: the cDNA encoding human PNPLA3 (NCBI Reference Sequence: NM\_025225.3) was inserted into pEG BacMam vector with a FLAG tag at the N terminus. The coding region of plasmid was validated by DNA sequencing. The BacMam was expressed in mammalian HEK293S GnTI<sup>-</sup> cells using baculovirus-mediated transduction as previously described (5). After 8 h, sodium butyrate (10 mM) was added and the cells were placed at 30°C for 72 h. Cells were homogenized in Buffer A (20 mM HEPES, pH 7.5, 150 mM NaCl) supplemented with leupeptin (10 µg/mL) and PMSF (1 mM) and then lysed by sonication. Cellular debris was removed by low-speed centrifugation. The supernatant was then incubated with 1% (w/v) n-Dodecyl-β-D-Maltopyranoside (DDM) for 1 h at 4°C. The insoluble fraction was removed by centrifugation (15,000g, 4°C, 30 min), and the supernatant was loaded onto anti-FLAG M2 resin, pre-equilibrated with Buffer A plus 0.02% DDM (Buffer B). The resin was washed with 15 mL Buffer B plus 2 mM ATP and 4 mM MgCl<sub>2</sub>, and then again with Buffer B by gravity flow. Protein was eluted in 7.5 mL of Elution Buffer (20 mM HEPES, pH 7.5, 150 mM NaCl, 0.02% DDM, 0.1 mg/mL 3x FLAG peptide) and further purified by size-exclusion chromatography using a Superose 6 Increase, 10/300 GL



column pre-equilibrated with Buffer B. Peak fractions containing target proteins were concentrated and stored in -80 °C for further analysis.

**Co-immunoprecipitation of BFAR and PNPLA3 *In Vitro*.** Purified His<sub>6</sub>-BFAR (1-331 aa) and FLAG- PNPLA3 were incubated at molar ratio of 1.4:1. Briefly, A total of 5 µg each protein [His<sub>6</sub>-BFAR(1-331 aa) (0.14 nmol) and FLAG-PNPLA3 (0.10 nmol) ] was incubated in 500 µl TBST at room temperature for 1 h. A total of 25 µl was retained (input). The remainder was added in equal parts (237.5 µl each) to 20 µl of pre-washed Ni-NTA or FLAG-beads and rotated at 4°C overnight. Beads were pelleted by centrifugation (1000g x 3 min) and the supernatant was saved (flow through, FT). Pelleted beads were washed X 3 for 5 min each. After the final wash, beads were resuspended in 2x Sample Buffer (50 µl) and then boiled at 95°C for 10 min. A total of 20% of both the input and flow through and all of the immunoprecipitates were size-fractionated using SDS-PAGE (4-15%) and transferred to nitrocellulose membranes prior to immunoblotting.

**Co-immunoprecipitation of Recombinant BFAR and PNPLA3 in HuH7 cells.** A total of 15 µg of pcDNA3.1-PNPLA3-3xFLAG and pCMV3-Myc-BFAR or empty vector were co-transfected in HuH7 cells in 100 mm dishes using Lipofectamine 3000 (Invitrogen) according to the instructions of the manufacturer. Cells were harvested after 48 h and lysed in lysis buffer (50 mM Tris-Cl, pH 7.5, 150 mM NaCl, 1% Triton® X-100, 0.1% sodium deoxycholate, plus protease inhibitors and benzonase nuclease). For immunoprecipitation, 50 µg of pre-washed magnetic beads were incubated with 240 µg cell lysate for 16 h at 4°C. Beads were washed three times (10 min/each) in the same buffer and after the final wash, beads were mixed with 2X Laemmli Sample Buffer (60 µl) and boiled at 95°C for 5 min prior to immunoblotting.

***In Vitro* Reconstitution of Ubiquitin Conjugation Reaction.** All recombinant proteins were purchased from a commercial company except BFAR and PNPLA3. Complementary DNA encoding truncated human BFAR (1-331 aa, NCBI Reference Sequence: NM\_016561.3) was cloned into pET28a vector at *Bam*HI/*Not*I sites, downstream of His<sub>6</sub> tag. The plasmid was transfected into *E.coli* (BL21) and cultured in LB plus kanamycin (50 µg/ml). Cells were induced by adding 0.5 mM IPTG and incubating at 16°C overnight. Cell pellets were lysed by sonication in Lysis Buffer (50 ml) containing 50 mM Tris, pH 7.5, 150 mM NaCl, 1 mM Tris(2-carboxyethyl)phosphine hydrochloride (TCEP) plus protease inhibitor. Supernatants were collected by centrifugation at 17,000g for 30 min. Cell lysates were diluted in Lysis Buffer (to 150 ml) and applied to HisTrap column (5 ml) by AKTA pure chromatography system. His<sub>6</sub>-BFAR was eluted using a linear NaCl (0-300 mM) gradient (100 ml) in Lysis Buffer. His<sub>6</sub>-BFAR containing fractions were collected and further concentrated by size exclusion chromatography using Superdex 200 10/300 GL column. His<sub>6</sub>-BFAR was added to 20% glycerol for storage at -80°C.

*In vitro* ubiquitination of PNPLA3 was performed by combining His<sub>6</sub>-Ubiquitin-activating Enzyme/UBE (15 µM) in 50 mM HEPES, pH 8.0, 50 mM NaCl, 1 mM TCEP, Ubiquitin-conjugating Enzyme E2 D2/UBE2D2 (25 µM) in 50 mM HEPES, pH 7.5, 200 mM NaCl, 10% glycerol, 1 mM TCEP, His<sub>6</sub>-BFAR(1-331 aa) (5 µM) in 50 mM Tris

buffer, FLAG-PNPLA3 (5  $\mu$ M) in 20 mM HEPES buffer, pH 7.5, 150 mM NaCl, 0.02% DDM and ubiquitin (2.5 mM) in sterile water. The final concentrations of the reactions (in 50  $\mu$ l) were as follows: 1 x E3 Ligase Buffer, 10 mM MgATP, 100  $\mu$ M Ub, 0.1  $\mu$ M E1, 1  $\mu$ M E2, 1  $\mu$ M BFAR, and 1  $\mu$ M PNPLA3 or as indicated. Reactions were incubated at 37°C for the indicated times and then terminated by adding 4x Laemmli Sample Buffer. Samples were resolved by 4-15% SDS-PAGE and transferred to nitrocellulose membranes. Immunoblotting was performed as described above.

**Ubiquitination of PNPLA3 in HuH7 Cells.** HuH7 cells stably expressing PNPLA3-HiBiT (3 x 10<sup>6</sup> cells/100 mm dish) were transfected with a scramble siRNA or anti-BFAR siRNA. After 32 h, medium was replaced with DMEM plus MG132 (10  $\mu$ M) and incubated 16 h before harvesting. For cell lysates, 1 ml of Lysis Buffer plus 20  $\mu$ M PR619 (deubiquitylation inhibitor) was added to the cell pellets. Lysates were rotated at 4°C for 1 h and centrifuged at 15,000g for 10 min and supernatants were collected. A total of 1.5 mg of lysate was incubated with pre-washed TUBE agarose beads at 4°C overnight. Beads were pelleted by centrifugation at 1000g for 3 min to collect flow through (FT). The beads were washed thrice with TBST at room temperature for 5 min and then resuspended in Sample Buffer (50  $\mu$ l), boiled at 95°C for 10 min, before loading 15  $\mu$ l (100%) was subjected to SDS-PAGE (4-15%), together with 22.5  $\mu$ g of lysate (6%) and proportional flow through samples (6%).

**Generation of Anti-Human and -Mouse mAb to BFAR.** DNA fragments encoding human and mouse BFAR (1-140 amino acids) were cloned into pET28a at *Bam*HI/*Not*I sites, downstream of the His<sub>6</sub> tag. Recombinant BFAR (1-140) that was purified from *E.coli* (BL21) were used to immunize mice, as described (1) to develop mouse mAb against human BFAR (mAb 10E10) and mouse BFAR (mAb 40H7).

**Inactivation of BFAR in Mice.** C57BL/6J BFAR knockout mice were generated using CRISPR-Cas9 technology by UT Southwestern Transgenic Technology Core facility as described previously(6). Two guide (g) gRNAs (sequences provided in Table S1) were designed to delete a ~760 bp region that includes exon 3. Both gRNAs were synthesized as crRNAs, annealed to the trans-activating CRISPR RNA (tracrRNA), and then co-injected with Cas9 protein into the cytoplasm of fertilized eggs (C57BL/6J) to produce F<sub>0</sub> founders, which were bred with WT C57BL/6J mice to obtain F<sub>1</sub> lines of mice heterozygous for the deleted *Bfar* allele (*Bfar*<sup>+/-</sup>). Two independent lines of *Bfar*<sup>+/-</sup> mice (with deletion of 794 bp and 773 bp, respectively) were chosen for further studies and both produced identical results. These deletion resulted in the splicing of exon 2 to exon 4, causing a frameshift and a premature stop codon. For all animal experiments, littermate wild-type (*Bfar*<sup>+/+</sup>) and knockout (*Bfar*<sup>-/-</sup>) mice produced from intercrosses of *Bfar*<sup>+/-</sup> mice were used. The *Bfar*<sup>+/-</sup> mice were genotyped by PCR using primers provided in Table S1 to amplify a fragment of 1143 bp (wild-type) or of 349 bp (or 370 bp) with deletion of 794 bp (or 773 bp), respectively). The knockout mice were backcrossed with C57BL/6J mice for 3 generations. Mice were maintained at 21–23°C on a 12-h dark/light cycle (lights on: 6:00 AM–6:00 PM), and fed a rodent chow diet. For the dietary challenge studies, mice were fed a high sucrose diet (HSD) for 3 wks. Prior to each experiment, mice were metabolically synchronized for 3 days by removing food during

the night for 15 h (6:00 PM–9:00 AM) and providing food at 9:00 AM. Samples were collected 6 h after the mice were provided food at the end of the last feeding cycle. All animal experiments has been approved and conducted under the oversight of the UT Southwestern Institutional Animal Care and Use Committee.

**Isolation of Hepatic LDs from Livers of Mice.** Lipid droplets (LDs) from mouse livers were fractionated as described (7). Briefly, livers were homogenized in 20 mM Tricine, pH 7.8, 250 mM sucrose (7 ml). Lysates were centrifuged at 500g for 5 min to remove nuclei and an aliquot of post-nuclear supernatant (PNS) (7 ml) was transferred to an ultracentrifuge tube. The PNS was overlaid with 5 ml of Buffer C (100 mM KCl, 2 mM MgCl<sub>2</sub>, 20 mM HEPES, pH 7.4) and then centrifuged at 10,000g for 1 h. The top layer (white) was transferred to an Eppendorf tube and subjected to centrifugation at 10,000g for 5 min. The infranatant under the LDs was removed using a gel loading tip and the LDs were suspended in Buffer C (300 µl) and then subjected to gentle vortexing. The wash step was repeated thrice. After the last wash, the LDs were vortexed vigorously in 1 ml acetone and then stored at -20°C overnight. Proteins from LDs were pelleted at 15,000g for 15 min at 4°C. The organic solvent was removed and pellets were washed twice by adding 1 ml each of acetone:ethyl ether (1:1)(v/v) and then ethyl ether. The protein pellets were dried by air in a chemical hood and then solubilized in 50-150 µl LD Protein Dissolving Buffer (2% SDS, 1 M urea in PBS). The protein concentration was measured by BCA and proteins (1 µg) were resolved by SDS-PAGE and transferred to nitrocellulose membranes. Immunoblotting was performed as described above.

## Figures and Figure Legends

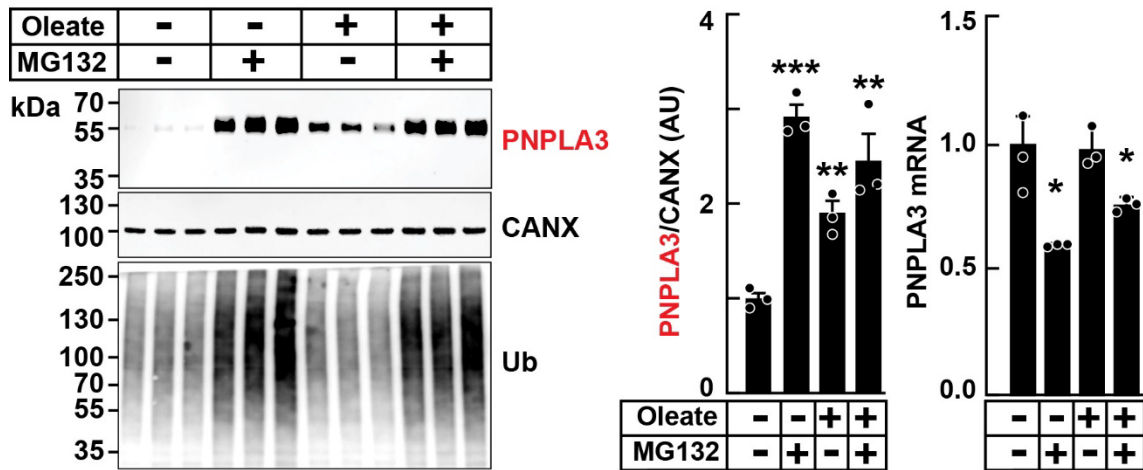

**Fig. S1.** NanoBiT blotting assay of PNPLA3-HiBiT cells in the presence or absence of oleate and MG132. HuH7 cells stably expressing PNPLA3-HiBiT were incubated for 24 h in the presence or absence of oleate (400  $\mu$ M) and MG132 (10  $\mu$ M) diluted in DMSO, or with DMSO alone. After 8 h, levels of PNPLA3 were quantified in cell lysates (5  $\mu$ g) using the NanoBiT blotting assay (see Methods). Levels of calnexin (CANX) and ubiquitin (Ub) were assayed using antibodies listed in *SI Appendix*. The signals corresponding to PNPLA3 were quantified by LI-COR, normalized to CANX levels, and expressed as arbitrary units (AUs). PNPLA3 mRNA levels were quantified using RT-PCR as described in the Methods. Values represent means  $\pm$  SEM. The levels of PNPLA3 protein and mRNA were compared using student t-test. \*,  $P < 0.05$ , \*\*,  $P < 0.01$ , \*\*\*,  $P < 0.001$ . The experiment was repeated twice and the results were similar.

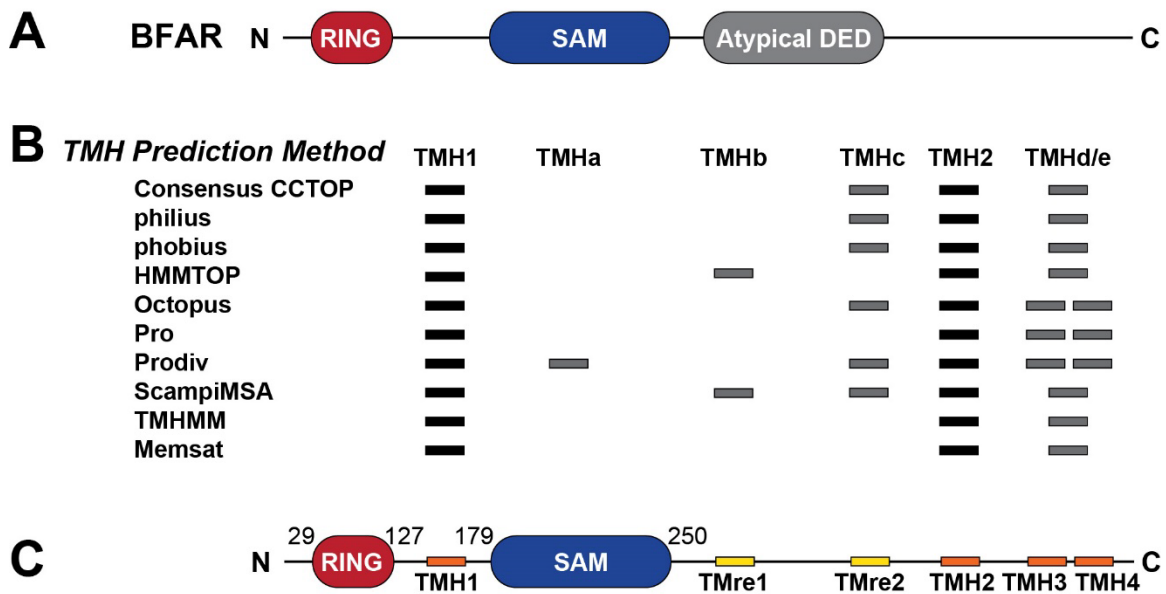

**Fig. S2.** Schematic of predicted structural domains of BFAR. (A) Previously described BFAR domains (ovals) are depicted: RING (red), SAM (blue), and atypical DED (gray). (B) Consensus Constrained TAPology prediction (CCTOP) was used to predict transmembrane helix (TMH) positions (rectangles colored according to consistency: black and gray predicted using all or some algorithms, respectively), with consensus TMH on top and additional methods below (labeled to the left).

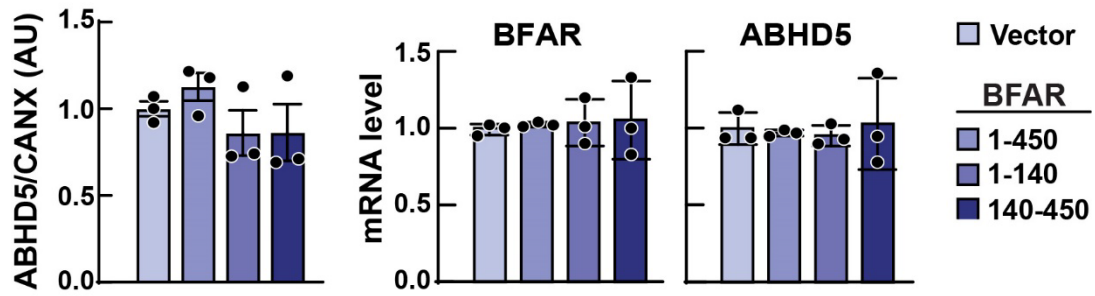

**Fig. S3.** Levels of selected proteins and mRNAs from the experiment shown in Fig. 2B. Levels of immunodetectable ABHD5 protein, and BFAR and ABHD5 mRNA were quantified as describe in the legend to Fig. 2B. Values represent means  $\pm$  SEM.

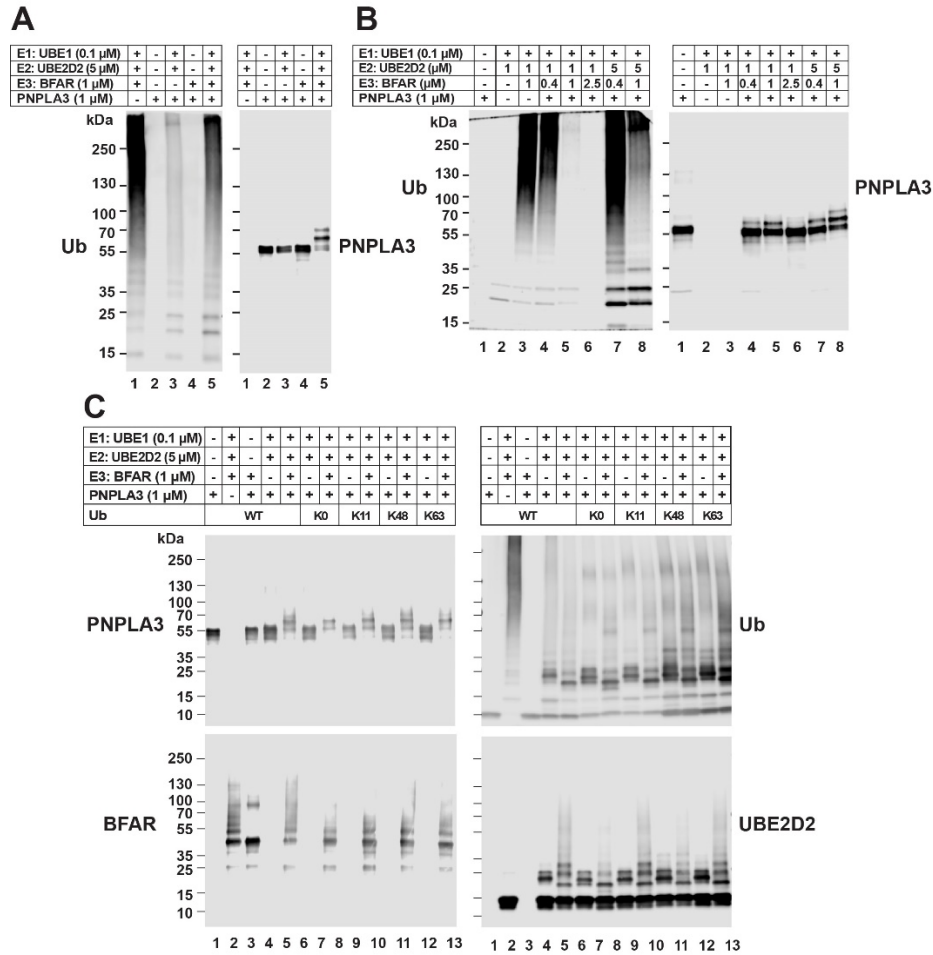

**Fig. S4.** *In vitro* reconstitution of BFAR-mediated ubiquitylation of PNPLA3. Proteins were incubated in E3 ligase buffer (50 μl) to reconstitute the ubiquitin conjugation reaction *in vitro* as described in the Methods. Immunoblotting was performed on 15% of the volume of each reaction using mAb to ubiquitin, PNPLA3, and BFAR, or rabbit pAb to UBE2D2. (A) *In vitro* reconstitution of BFAR-mediated ubiquitylation of PNPLA3 showed multiple ubiquitinated bands in Lane 5 compared to control sets (Lane 1-4). (B) Titration of BFAR and E2 (UBE2D2) in reconstitution of BFAR-mediated ubiquitylation of PNPLA3 *in vitro*. Increasing concentration of BFAR did not increase ubiquitination of PNPLA3 (Lane 4-6). Increasing concentration of E2 (UBE2D2) increases ubiquitination of PNPLA3 (Lane 7 and 8 vs Lane 4 and 5). (C) BFAR-mediated mono-ubiquitination of PNPLA3. WT, K0, K11, K48 and K63-ubiquitin were added as indicated in the figure. PNPLA3 immunoblots showed that ubiquitin chains were added in each reaction. Ub, BFAR and UBE2D2 blots indicate ubiquitination on each components of the reaction. The experiment was repeated twice and the results were similar.

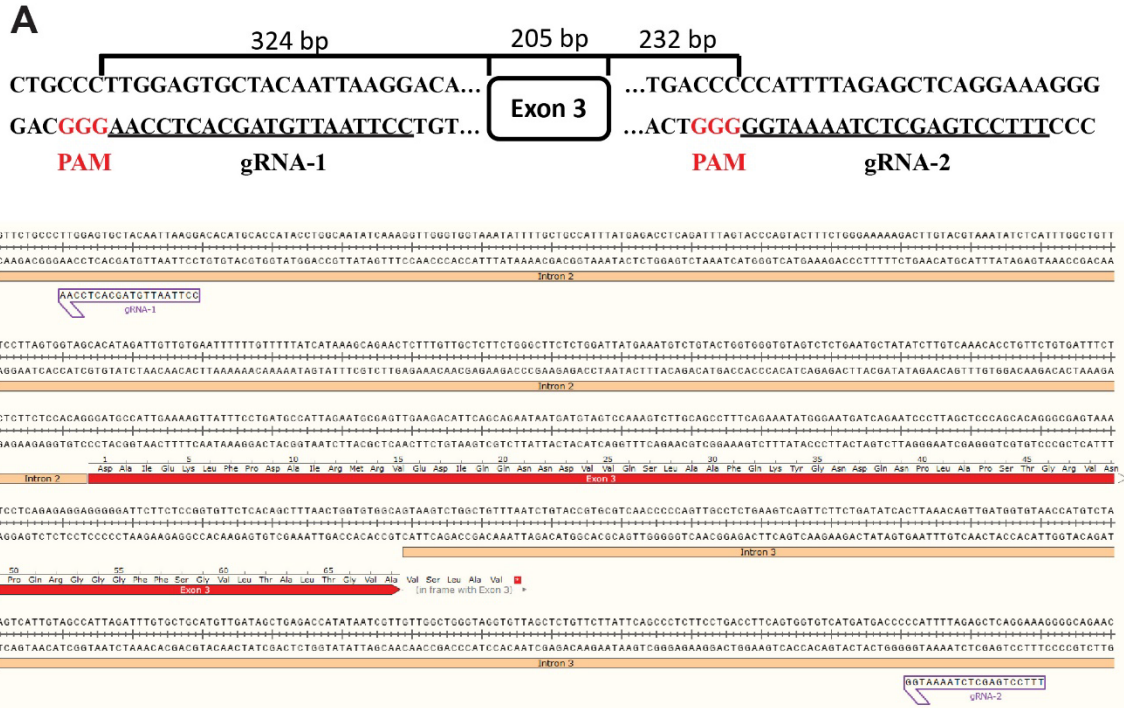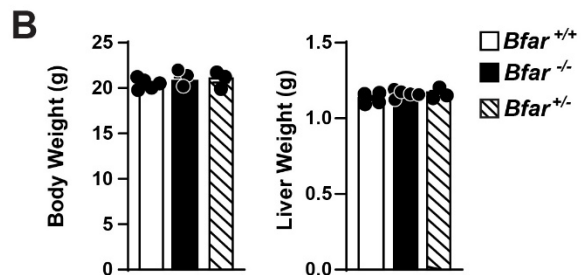

**Fig. S5.** Generation of *Bfar*<sup>-/-</sup> Mice using CRISPR-Cas9. (A) Schematic for CRISPR-Cas9 inactivation of *Bfar* in mice. The location and sequence of two gRNAs used to generate *Bfar*<sup>-/-</sup> mice are shown. The gRNA are complimentary to sequences located in the introns flanking exon 3 (gRNA-1 and gRNA-2, respectively). PAM (NGG) sequences are highlighted. (B) Body and liver weights of WT, *Bfar*<sup>+/-</sup>, and *Bfar*<sup>-/-</sup> mice. Male mice (5/group, 8 weeks old) were fed a HSD for 3 weeks. After 3 cycles of fasting and refeeding, mice were killed and livers were harvested 6 h after the last refeeding. Body weights and liver weights were measured. Values represent means ± SEM.



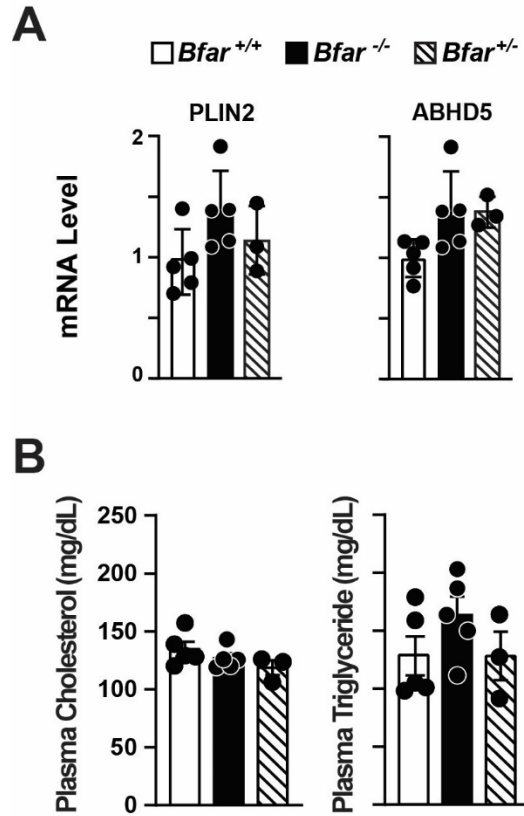

**Fig. S6.** Hepatic mRNA levels in livers of *Bfar*<sup>-/-</sup> mice. The mRNA levels of indicated genes (PLIN2 and ABHD5) were measured and normalized as described in Fig. 6 and in the Methods. (B) Mean levels of plasma cholesterol and triglyceride in offspring of *Bfar*<sup>+/-</sup> mice of the indicated genotypes. Values represent means  $\pm$  SEM. The experiments were repeated twice and the results were similar.

**Table S1.** Sequences of oligonucleotides and siRNAs

**Subcloning:**

|                                                                    |                                                                                                                                         |
|--------------------------------------------------------------------|-----------------------------------------------------------------------------------------------------------------------------------------|
| PNPLA3/PNPLA3 (I148M) cDNA --> pBiT3.1                             | 5'-<br>CCGGAATTCATGTACGACGCAGAGCGC<br>GGC-3'<br>5'-<br>CCCGAGCTCTCCAGACTCTTCTCTAGTG<br>A-3'                                             |
| PNPLA3-HiBiT/PNPLA3 (I148M)-HiBiT cDNA --> pLVX-EF1alpha-IRES-Puro | 5'-<br>CCGGAATTCATGTACGACGCAGAGCGC<br>GGC-3'<br>5'-<br>TGCTCTAGACAGCTAATCTTCTTGAACA<br>GCCG<br>CCAGCCGCTCACCAGACTCTT-3'                 |
| BFAR cDNA --> pET28a                                               | 5'-<br>CGCGGATCCATGGAGGAACCTCAGAAA<br>AGC-3'<br>5'-<br>TTTTCCTTTTGCGGCCGCTCACAAACACC<br>TGGGT<br>TTCCAGCC-3'                            |
| FLAG-PNPLA3 cDNA --> pEG BacMam                                    | 5'-<br>CCGGAATTCATGGATTACAAGGACGAC<br>GATGAC AAGTACGACGCAGAGCGCGG-<br>3'<br>5'-<br>ATAAGAATGCGGCCGCTCACAGACTCT<br>TCTCTAG TGAAAAACTG-3' |
| <b>Quantitative PCR:</b>                                           |                                                                                                                                         |
| BFAR-F(1333-1412)                                                  | 5'-TGGATCCCTTTCTCTGAATGGA-3'                                                                                                            |
| BFAR-R(1333-1412)                                                  | 5'-<br>TGAATAACATGAAGGCCACTAAATCT-3'                                                                                                    |
| PNPLA3-F(623-693)                                                  | 5'-CTACAGTGGCCTTATCCCTCCTT-3'                                                                                                           |
| PNPLA3-R(623-693)                                                  | 5'-GTACGTTGTCACTCACTCCTCCAT-3'                                                                                                          |
| ATGL-F(1952-2042)                                                  | 5'-CCCTTTACTCCTGAGAACTTTGCA-3'                                                                                                          |
| ATGL-R(1952-2042)                                                  | 5'-<br>GCGAAAATAAATAATTCTTCACACACA<br>T-3'                                                                                              |
| SREBP-1c-F(176-177)                                                | 5'-GGGCGGGCGCAGAT-3'                                                                                                                    |
| SREBP-1c-R(176-177)                                                | 5'-TTGTTGATAAGCTGAAGCATGTCTT-3'                                                                                                         |
| 36b4-F(164-233)                                                    | 5'-GGCCTGAGCTCCCTGTCTCT-3'                                                                                                              |
| 36b4-R(164-233)                                                    | 5'-GCGGTGCGTCAGGGATT-3'                                                                                                                 |

**sgRNAs for BFAR inactivation in cells:**

sgRNA1 (Exon 6)

5'-GTTTGACTACACCGACACCT-3'

sgRNA2 (Exon 4)

5'-GTGATAGACGAGCAGGACCA-3'

**Oligos to confirm BFAR inactivation in cells:**

sgRNA1-F

5'-TCTTTATACAATGTAACCCCAAATG-3'

sgRNA1-R

5'-GCATGTGACTTGATATGAACAGG-3'

sgRNA2-F

5'-GTCCTTTTCTCGCCTCTGTG-3'

sgRNA2-R

5'-GAAAGCTGTTTTCTAAAATGTCCA-3'

**sgRNAs for generating *Bfar*<sup>-/-</sup> mice**

gRNA-1

5'-CCTTAATTGTAGCACTCCAA-3'

gRNA-2

5'-TTTCCTGAGCTCTAAAATGG-3'

**Oligos to genotype *Bfar*<sup>-/-</sup> mice by PCR**

Forward

5'-CATGAACCCTTTAACCCAACA-3'

Reverse

5'-CCGTAACAGTGCAGACATGG-3'

---

**Table S2:** Silencing RNAs (siRNAs) that caused  $\geq 2$ -fold increase in PNPLA3 in PNPLA3-HiBiT cells.

| siRNA       | Fold change in PNPLA3/CANX | P value      |
|-------------|----------------------------|--------------|
| RNF144A     | 10.3                       | 0.395        |
| MKRN2       | 8.9                        | 0.001        |
| RNF10       | 7.5                        | 0.211        |
| MIB2        | 7.5                        | 0.166        |
| MARCH9      | 5.6                        | 0.049        |
| RNFT1       | 4.2                        | 0.080        |
| RNF214      | 3.8                        | 0.016        |
| BIRC3       | 3.7                        | 0.090        |
| BMI1        | 3.7                        | 0.126        |
| KDM5B       | 3.1                        | 0.157        |
| NSD1        | 3                          | 0.023        |
| RNF34       | 2.7                        | 0.277        |
| RNF2        | 2.7                        | 0.105        |
| RNF170      | 2.7                        | 0.178        |
| RNF182      | 2.5                        | 0.149        |
| RNFT2       | 2.5                        | 0.099        |
| <b>BFAR</b> | <b>2.5</b>                 | <b>0.041</b> |
| RNF157      | 2.5                        | 0.545        |
| RNF144B     | 2.3                        | 0.128        |
| RNF128      | 2.2                        | 0.352        |

PNPLA3 levels were quantified by LI-COR and expressed as arbitrary units (AUs) and normalized to levels of calnexin. The fold change of levels with each siRNA was compared to the corresponding non-siRNA treated cells. Four biological replicates were used for each siRNA and two for non-treated siRNA controls. Welch t-test was used to calculate the statistical significance of PNPLA3 fold change with siRNA knockdown.

**Table S3a.** Offspring of heterozygous matings of *BFAR*<sup>-/-</sup> mice (794 bp deletion)

|           | Males (n=91) |               |          |                 | Females (n=59) |       |          |         |                | Total (n=150) |    |          |    |
|-----------|--------------|---------------|----------|-----------------|----------------|-------|----------|---------|----------------|---------------|----|----------|----|
|           | Observed     |               | Expected |                 | Observed       |       | Expected |         |                | Observed      |    | Expected |    |
|           | #            | %             | #        | %               | #              | %     | #        | %       |                | #             | %  | #        | %  |
| (+/+)     | 15           | 17            | 23       | 25              | 17             | 29    | 15       | 25      | <b>Males</b>   | 91            | 61 | 75       | 50 |
| (+/-)     | 45           | 49            | 45       | 50              | 29             | 49    | 29       | 50      | <b>Females</b> | 59            | 39 | 75       | 50 |
| (-/-)     | 31           | 34            | 23       | 25              | 13             | 22    | 15       | 25      |                |               |    |          |    |
| Breedings |              |               |          |                 |                | Pups  |          |         |                |               |    |          |    |
| Male      | Female       | No. of Litter |          | Pups per litter |                | Males |          | Females |                |               |    |          |    |
| (+/-)     | (+/-)        | 26            |          | 6               |                | 91    |          | 59      |                |               |    |          |    |

**Table S3b.** Offspring of heterozygous matings of *BFAR*<sup>-/-</sup> mice (773 bp deletion)

|           | Males (n=42) |               |          |                 | Females (n=42) |       |          |         |                | Total (n=84) |    |          |    |
|-----------|--------------|---------------|----------|-----------------|----------------|-------|----------|---------|----------------|--------------|----|----------|----|
|           | Observed     |               | Expected |                 | Observed       |       | Expected |         |                | Observed     |    | Expected |    |
|           | #            | %             | #        | %               | #              | %     | #        | %       |                | #            | %  | #        | %  |
| (+/+)     | 13           | 31            | 10       | 25              | 7              | 17    | 10       | 25      | <b>Males</b>   | 42           | 50 | 42       | 50 |
| (+/-)     | 26           | 62            | 22       | 50              | 22             | 52    | 22       | 50      | <b>Females</b> | 42           | 50 | 42       | 50 |
| (-/-)     | 3            | 7             | 10       | 25              | 13             | 31    | 10       | 25      |                |              |    |          |    |
| Breedings |              |               |          |                 |                | Pups  |          |         |                |              |    |          |    |
| Male      | Female       | No. of Litter |          | Pups per litter |                | Males |          | Females |                |              |    |          |    |
| (+/-)     | (+/-)        | 18            |          | 4.6             |                | 42    |          | 42      |                |              |    |          |    |

## SI References

1. Kohler G & Milstein C (1975) Continuous cultures of fused cells secreting antibody of predefined specificity. *Nature* 256:495-497.
2. Engelking LJ, *et al.* (2004) Overexpression of Insig-1 in the livers of transgenic mice inhibits SREBP processing and reduces insulin-stimulated lipogenesis. *J Clin Invest* 113:1168-1175.
3. Biederman J, Yee J, & Cortes P (2004) Validation of internal control genes for gene expression analysis in diabetic glomerulosclerosis. *Kidney international* 66:2308-2314.
4. Huang Y, Cohen JC, & Hobbs HH (2011) Expression and characterization of a PNPLA3 protein isoform (I148M) associated with nonalcoholic fatty liver disease. *J Biol Chem* 286:37085-37093.
5. Goehring A, *et al.* (2014) Screening and large-scale expression of membrane proteins in mammalian cells for structural studies. *Nature protocols* 9:2574-2585.
6. Luo F, *et al.* (2021) Missense variant in insulin receptor (Y1355H) segregates in family with fatty liver disease. *Mol Metab* 53:101299.
7. Zhang S, *et al.* (2016) Morphologically and Functionally Distinct Lipid Droplet Subpopulations. *Sci Rep* 6:29539.
